# Supplementary material for: Signal sequence–independent SRP-SR complex formation at the membrane suggests an alternative targeting pathway within the SRP cycle
Source: PubMed Central journal article supplement — Mol Biol Cell. 2011 Jul 1;22(13):2309–23. doi: 10.1091/mbc.E11-02-0152 (PMC3128533; doi:10.1091/mbc.e11-02-0152), 2011-07-01
Supplement: E11-02-0152_1.pdf [file E11-02-0152_1.pdf]

SUPPLEMENTARY INFORMATION TO

**Signal-sequence-independent SRP-SR complex formation at the membrane suggests an  
alternative targeting pathway within the SRP cycle**

David Braig<sup>\*‡</sup>, Miryana Mircheva<sup>\*‡</sup>, Ilie Sachelaru<sup>\*†‡</sup>, Eli O. van der Sluis<sup>§</sup>, Lukas Sturm<sup>\*</sup>,  
Roland Beckmann<sup>§</sup> and Hans-Georg Koch<sup>\*</sup>

<sup>\*</sup>Institut für Biochemie und Molekularbiologie, ZBMZ, and <sup>†</sup>Fakultät für Biologie, Albert-Ludwigs-Universität Freiburg, Stefan-Meier-Strasse 17, 79110 Freiburg, and <sup>§</sup>Gene Center and Center of integrated Protein Science Munich CiPS-M, Dept. for Biochemistry, Ludwigs-Maximilian-Universität Muenchen, 81377 Muenchen, FR Germany

<sup>‡</sup>These authors contributed equally to this study

Correspondence to:

Hans-Georg Koch

[Hans-Georg.Koch@biochemie.uni-freiburg.de](mailto:Hans-Georg.Koch@biochemie.uni-freiburg.de)

Phone 0049-761-2035250

Fax 0049-761-2035289

Running head: Targeting by a pre-formed SRP-SR complex

**Supplementary Table S1:** Sequences of oligonucleotides used for PCR-based mutagenesis and cloning.

| <b>name</b>        | <b>sequence</b>                                                                       |
|--------------------|---------------------------------------------------------------------------------------|
| FtsY_fusion_r      | 5'-gtg gct gaa ttc tgg act tgg act tgg act tgg act gcc atc ctc tgc ggc aaa aag tgc-3' |
| FtsY_fusion_f      | 5'-ata cat acc atg gcg aaa gaa aaa aaa cgt ggc-3'                                     |
| Ffh_fusion_f       | 5'-agc cac gaa ttc agt cca agt cca agt cca agt cca ggc ttt gat aat tta acc gat cgt-3' |
| Ffh_fusion_r       | 5'-gtg gct aag ctt tca gtg gtg gtg gtg gtg ggc acc agg gaa gcc tgg ggg-3'             |
| CM_p15A_pBAD_for   | 5'-tag aca taa gcg gct att taa cga ccc tgc -3'                                        |
| CM_p15A_pBAD_rev   | 5'-gcg cca cag gtg cgg ttg ct-3'                                                      |
| pTrc99a_Amp_for    | 5'-agc cga acg acc gag cg-3'                                                          |
| pTrc99a_Amp_rev    | 5'-gga tac ata ttt gaa tgt att tag aaa aat-3'                                         |
| Ffh_A144W_for      | 5'-ccg gcg tgg atc aaa cag ctt gag ac-3'                                              |
| Ffh_A144W_rev      | 5'-gcg ata aac gtc ggc aga aac ca-3'                                                  |
| FtsY_A336W_for     | 5'-ttc cgt gca gct tgg gtt gaa cag c-3'                                               |
| FtsY_A336W_rev     | 5'-agt atc acc cgc cgc cag cat c-3'                                                   |
| Ffh_YFP_XbaI       | 5'-gtg tac tct aga agg agt gtg cct tga tgt ttg at-3'                                  |
| Ffh_YFP_pBad33_rev | 5'-aaa tct tct ctc atc cgc caa aac-3'                                                 |
| GFP_EcoRI_for      | 5'-tag cca cga att cct atg cgg ccg cag taa agg aga a-3'                               |
| GFP_EcoRI_rev      | 5'-tgg cat tga att ctt tgt ata gtt cat cca tgc cat gtg taa tcc c-3'                   |
| Dav_Hf             | 5'-tta aaa acc aaa gaa aat ctc gg ttcc-3'                                             |
| Dav_Hr             | 5'-acc ttc ttt ggt cgg ttt ttc ctg-3'                                                 |
| K198_Dav_f         | 5'-ttt ttc gcg aag ctg aaa cgc-3'                                                     |
| D198_Dav_f         | 5'-ttt ttc gcg gac ctg aaa cgc-3'                                                     |
| A198_Dav_f         | 5'-ttt ttc gcg gca ctg aaa cgc-3'                                                     |
| R198D+K200D_f_Dav  | 5'-gcg gac ctg gac cgc agc ctg-3'                                                     |
| Fw-NcoI-TatC       | 5'- gcg ccc atg gct gta gaa gat act caa ccg c-3'                                      |
| Rev-NcoI-TatC      | 5'- gcg ccc atg ggt tct tca gtt ttt tgc ctt tc-3'                                     |

**Legend to Supplementary Figure S1:** The 400 kDa complex is also observed with in <sup>35</sup>S-Ffh and recognized by both  $\alpha$ -Ffh and  $\alpha$ -FtsY antibodies. (A) *In vitro* synthesized Ffh was incubated with inner membrane vesicles in the presence or absence of the non-hydrolysable GTP-analogue GMP-PNP. After solubilisation with dodecyl maltoside, the samples were treated either with pre-immune serum (pre-IS) or with antibodies against Ffh ( $\alpha$ -Ffh) or FtsY ( $\alpha$ -FtsY) and separated on a 5-10% BN-PAGE gel. Note that Ffh in contrast to FtsY (*c.f.* Fig. 1) does not show a distinct band on BN-PAGE. (B) Determination of the SRP content in INV. Different amounts of purified Ffh and 5 $\mu$ l INV were TCA-precipitated and separated on a 13% SDS-PAGE before western blotting and immune detection using  $\alpha$ -Ffh antibodies.

A

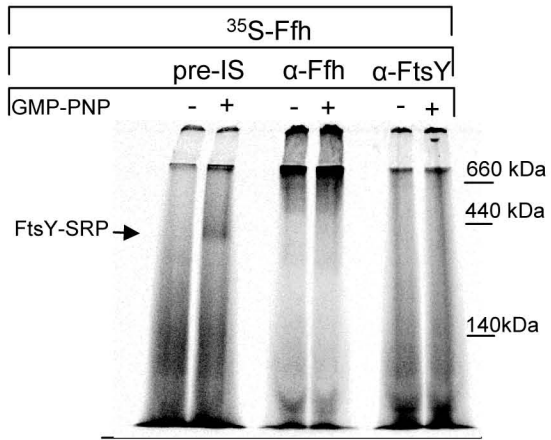

B

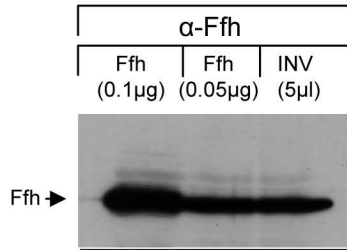

(Braig et al., Fig. S1)
